# Supplementary material for: Anti-Apoptotic and Antioxidant Activities of the Mitochondrial Estrogen Receptor Beta in N2A Neuroblastoma Cells
Source: MDPI journal article supplement (doi:10.3390/ijms22147620), 2021-07-16

# Supplementary Data

## Anti-apoptotic and Antioxidant Activities of the Mitochondrial Estrogen Receptor Beta in N2A Neuroblastoma Cells

Ioannis Tsialtas, Achilleas Georgantopoulos, Maria E. Karipidou, Foteini D. Kalousi, Aikaterini G. Karra, Demetrios D. Leonidas and Anna-Maria G. Psarra \*

Department of Biochemistry and Biotechnology, University of Thessaly, 41500 Larissa, Greece; tsialtasj@gmail.com (I.T.), ageorgant@bio.uth.gr (A.G.); mkaripidou@uth.gr (M.E.K.); fokalous@bio.uth.gr (F.D.K.); aikaterini.g.karra@gmail.com (A.G.K.); ddleonidas@bio.uth.gr (D.D.L.)  
 \* Correspondence: ampsarra@bio.uth.gr; Tel.: +30-2410-565221

Supplementary Figure 1 (Figure S1)

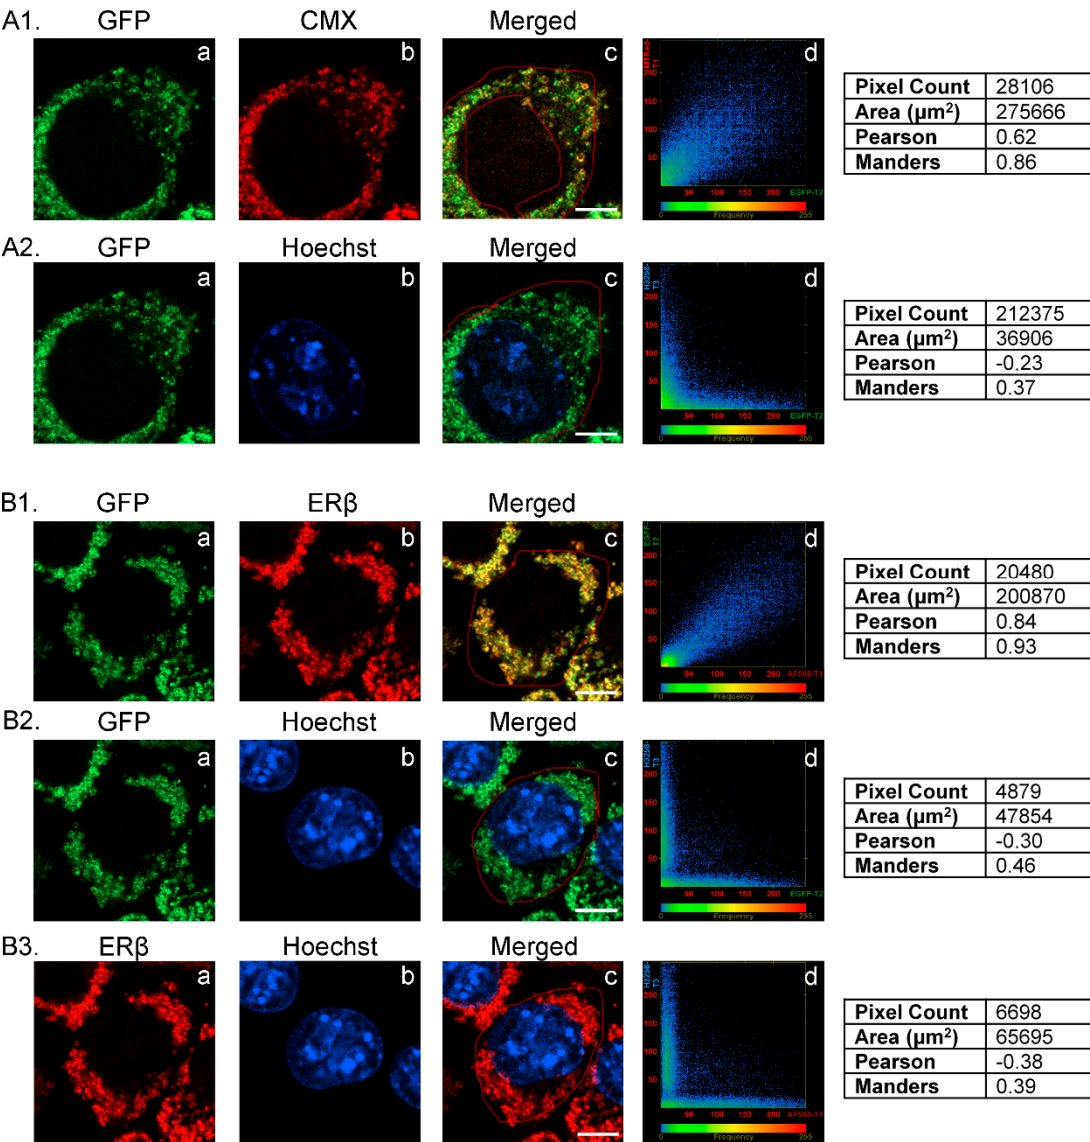

Supplement: s1 [file s1]
